# Supplementary material for: An Evolution-Based Screen for Genetic Differentiation between Anopheles Sister Taxa Enriches for Detection of Functional Immune Factors
Source: PLoS Pathog. 2015 Dec 3;11(12):e1005306. doi: 10.1371/journal.ppat.1005306 (PMC4669117; doi:10.1371/journal.ppat.1005306)
Supplement: S2 Table — Summary data for all experimental replicates testing the effect of target gene silencing compared to control treatment with dsGFP. Statistically significant differences are indicated by green shading. Row indicates target gene tested (injected dsRNA) and challenge parasite (infection) for a given replicate, with the corresponding replicates indicated in the following row(s) for the same target gene and parasite. Individual p-values were calculated per replicate by statistical comparison to the control experiment indicated in the same row (control experiment #), which refers to the corresponding dsGFP control experiment shown in column 1 (experiment #). If the replicates of a gene/parasite test were consistent (in the same phenotypic direction, see Methods), then the individual p-values were combined by Fisher's method (Fisher combined prob). If the replicate phenotypes were not consistent, the individual p-values are shown but combining of p-values is not justified. NA, Not Appropriate, combining of individual p-values not justified; NM, Not Measured, specific phenotype not measured because infrequent. Data presented in this table is summarized in graphical form in Fig 5. (XLSX) [file ppat.1005306.s002.xlsx]

## Sheet: TableS2
Table S2. Statistical analysis of infection phenotypes following gene silencing. Summary data for all experimental replicates testing the effect of target gene silencing compared to control treatment with dsGFP. Statistically significant differences are indicated by green shading. Row indicates target gene tested (injected dsRNA) and challenge parasite (infection) for a given replicate, with the …
								oocyst prevalencea				oocyst intensityb				melanization prevalencea
experiment #	figure #c	infectiond	injected dsRNA	cluster	number of mosquitoes	prevalence (%)	control experiment #e	individual p-valuef	Fisher combined prob.g	median	control experiment #	individual p-value	Fisher combined prob.	prevalence (%)	control experiment #	individual p-value	Fisher combined prob.
1	2A, 2B, 7A, 7B	Pf	dsGFP		30	46	—	—	—	2	—	—	—	NM	—	—	—
2	2A, 2B, 7A, 7B	Pf	dsGFP		30	40	—	—	—	1.5	—	—	—	NM	—	—	—
3	2A, 2B	Pf	dsGFP		39	25	—	—	—	1	—	—	—	NM	—	—	—
4	7A, 7B	Pf	dsGFP		40	40	—	—	—	1	—	—	—	NM	—	—	—
5	2A, 2B, 7A, 7B	Pf	dsAPL1A	2	30	76	1	0.033	0.0006	2	1	0.81	0.96	NM	—	—	—
6	2A, 2B, 7A, 7B	Pf	dsAPL1A	2	30	70	2	0.036	—	1	2	0.68	—	NM	—	—	—
7	2A, 2B	Pf	dsAPL1A	2	40	57	3	0.006	—	1	3	0.86	—	NM	—	—	—
8	7A, 7B	Pf	dsAPL1B	2	27	44	3	0.79	NA	1	3	0.37	NA	NM	—	—	—
9	7A, 7B	Pf	dsAPL1B	2	39	35	4	0.81	—	1	4	0.96	—	NM	—	—	—
10	7A, 7B	Pf	dsAPL1A+B	2	30	76	1	0.03	0.025	3	5	0.0008	3.9e-06	NM	—	—	—
11	7A, 7B	Pf	dsAPL1A+B	2	30	63	2	0.12	—	4	6	0.003	—	NM	—	—	—
12	3A, 3B, 3C	Py	dsGFP		36	38	—	—	—	1	—	—	—	41	—	—	—
13	3A, 3B, 3C	Py	dsGFP		32	34	—	—	—	1	—	—	—	28	—	—	—
14	7C, 7D	Py	dsGFP		22	31	—	—	—	1	—	—	—	81	—	—	—
15	7C, 7D	Py	dsGFP		31	29	—	—	—	1	—	—	—	64	—	—	—
16	7C, 7D	Py	dsGFP		30	16	—	—	—	3	—	—	—	36	—	—	—
17	7C, 7D	Py	dsAPL1B	2	21	23	14	0.74	0.96	2	14	0.28	0.48	90	14	0.66	0.21
18	7C, 7D	Py	dsAPL1B	2	35	28	15	1	—	1	15	0.62	—	85	15	0.08	—
19	3A, 3B, 3C	Py	dsAPL1C	2	36	94	12	1.9e-05	9.0e-09	22	12	7.56e-05	2.5e-09	2	12	0.00005	5.8e-06
20	3A, 3B, 3C	Py	dsAPL1C	2	24	95	13	1.9e-05	—	25	13	1.40e-06	—	0	13	0.0073	—
21	7C, 7D	Py	dsAPL1C	2	22	100	14	9.9e-06	6.3e-13	100	14	2.0e-05	3.9e-11	0	14	1.0e-05	1.6e-11
22	7C, 7D	Py	dsAPL1C	2	28	92	16	9.9e-06	—	125	16	4.0e-04	—	0	16	0.00031	—
23	7C, 7D	Py	dsAPL1B+C	2	20	85	14	0.0007	3.3e-11	200	14	1.0e-05	2.4e-09	0	14	1.0e-05	1.9e-11
24	7C, 7D	Py	dsAPL1B+C	2	30	100	16	1.0e-06	—	190	16	1.0e-05	—	0	16	0.00036	—
25	2A, 2B	Pf	dsGFP		40	42	—	—	—	9	—	—	—	NM	—	—	—
26	2A, 2B	Pf	dsGFP		41	82	—	—	—	8	—	—	—	NM	—	—	—
27	2A, 2B	Pf	dsGFP		36	44	—	—	—	1	—	—	—	NM	—	—	—
28	2A, 2B	Pf	dsLRIM1	2	40	82	25	0.00054	0.0003	22	25	0.001	0.009	NM	—	—	—
29	2A, 2B	Pf	dsLRIM1	2	41	97	26	0.058	—	11	26	0.62	—	NM	—	—	—
30	2A, 2B	Pf	dsLRIM1	2	35	62	27	0.16	—	1	27	0.00027	—	NM	—	—	—
31	2A	Pf	dsGFP		33	36	—	—	—	1.5	—	—	—	NM	—	—	—
32	2A	Pf	dsGFP		36	44	—	—	—	3.5	—	—	—	NM	—	—	—
33	2A	Pf	dsGFP		30	46	—	—	—	5	—	—	—	NM	—	—	—
34	2A	Pf	dsGFP		30	60	—	—	—	2	—	—	—	NM	—	—	—
35		Pf	dsGFP		40	50	—	—	—	2	—	—	—	NM	—	—	—
36	2A	Pf	dsLRR7059	2	34	82	31	0.00015	2.8e-06	5.5	31	0.006	NA	NM	—	—	—
37	2A	Pf	dsLRR7059	2	39	71	32	0.02	—	1.5	32	0.18	—	NM	—	—	—
38	2A	Pf	dsLRR7059	2	30	80	33	0.015	—	7.5	33	0.74	—	NM	—	—	—
39	2A	Pf	dsLRR7059	2	30	86	34	0.039	—	5	34	0.03	—	NM	—	—	—
40		Pf	dsLRR7060	3	35	65	31	0.028	0.125	6	31	0.004	NA	NM	—	—	—
41		Pf	dsLRR7060	3	36	61	32	0.29	—	2	32	0.23	—	NM	—	—	—
42		Pf	dsLRR7060	3	39	51	35	1	—	4	35	0.21	—	NM	—	—	—
43		Pf	dsLRR7061	3	36	61	32	0.24	0.58	2	32	0.11	NA	NM	—	—	—
44		Pf	dsLRR7061	3	40	52	35	1	—	2	35	0.6	—	NM	—	—	—
45	3A, 3C	Py	dsGFP		30	13	—	—	—	1	—	—	—	70	—	—	—
46	3A, 3C	Py	dsGFP		30	10	—	—	—	1	—	—	—	70	—	—	—
47		Py	dsGFP		52	15	—	—	—	1	—	—	—	63	—	—	—
48		Py	dsGFP		36	11	—	—	—	1	—	—	—	55	—	—	—
49	3A, 3C	Py	dsLRR7059	2	30	26	45	0.33	0.44	1	45	1	1	60	45	0.58	0.71
50	3A, 3C	Py	dsLRR7059	2	30	20	46	0.47	—	1	46	1	—	60	46	0.59	—
51		Py	dsLRR7060	3	35	17	47	1	0.96	1	47	1	1	68	47	0.65	0.67
52		Py	dsLRR7060	3	34	14	48	0.73	—	1	48	1	—	64	48	0.47	—
53		Py	dsLRR7061	3	52	19	47	0.79	0.9	1	47	1	1	65	47	1	1
54		Py	dsLRR7061	3	38	15	48	0.74	—	1	48	1	—	57	48	1	—
55	2A	Pf	dsGFP		40	20	—	—	—	1	—	—	—	NM	—	—	—
56	2A	Pf	dsGFP		38	52	—	—	—	3	—	—	—	NM	—	—	—
57	2A	Pf	dsLRR7037	2	40	40	55	0.087	0.18	2	55	0.28	NA	NM	—	—	—
58	2A	Pf	dsLRR7037	2	40	62	56	0.49	—	1	56	0.01	—	NM	—	—	—
59	3A, 3C	Py	dsGFP		30	13	—	—	—	1	—	—	—	70	—	—	—
60	3A, 3C	Py	dsGFP		34	11	—	—	—	1	—	—	—	61	—	—	—
61	3A, 3C	Py	dsLRR7037	2	26	15	59	1	0.95	1	59	1	1	34	59	0.015	0.001
62	3A, 3C	Py	dsLRR7037	2	30	16	60	0.72	—	1	60	1	—	30	60	0.013	—
63	4D	Pb	dsGFP		42	35	—	—	—	2	—	—	—	NM	—	—	—
64	4D	Pb	dsGFP		66	21	—	—	—	1	—	—	—	NM	—	—	—
65	4D	Pb	dsTEP3	1	42	59	63	0.0002	0.0001	3	63	0.3719	0.0001	NM	—	—	—
66	4D	Pb	dsTEP3	1	60	53	64	0.05	—	3	64	3.0e-05	—	NM	—	—	—
67	4D	Pb	dsTEP4	2	40	32	63	0.83	NA	1	63	—	NA	NM	—	—	—
68	4D	Pb	dsTEP4	2	58	24	64	0.81	—	1	64	—	—	NM	—	—	—
69	4A	Pf	dsGFP		40	75	—	—	—	10.5	—	—	—	NM	—	—	—
70	4A	Pf	dsGFP		36	88	—	—	—	21	—	—	—	NM	—	—	—
71	4A	Pf	dsGFP		40	52	—	—	—	3	—	—	—	NM	—	—	—
72	4A	Pf	dsGFP		40	57	—	—	—	4	—	—	—	NM	—	—	—
73	4A	Pf	dsGFP		48	45	—	—	—	1	—	—	—	NM	—	—	—
74	4A	Pf	dsTEP3	1	40	75	71	0.06	0.24	2	71	0.20	NA	NM	—	—	—
75	4A	Pf	dsTEP3	1	29	55	72	1	—	3.5	72	0.87	—	NM	—	—	—
76	4A	Pf	dsTEP4	2	40	92	69	0.07	0.01	30	69	0.003	NA	NM	—	—	—
77	4A	Pf	dsTEP4	2	40	80	72	0.05	—	2.5	72	0.59	—	NM	—	—	—
78	4A	Pf	dsTEP4	2	33	66	73	0.07	—	1	73	0.44	—	NM	—	—	—
79	4A	Pf	dsTEP12	3	40	60	71	0.66	0.93	3	71	0.75	0.63	NM	—	—	—
80	4A	Pf	dsTEP12	3	40	57	72	1	—	2	72	0.37	—	NM	—	—	—
81	4A	Pf	dsTEP15	3	40	75	69	1	1	17.5	69	0.28	NA	NM	—	—	—
82	4A	Pf	dsTEP15	3	29	86	70	1	—	31	70	0.46	—	NM	—	—	—
83	4A	Pf	dsTEP15	3	40	50	71	1	—	2.5	71	0.44	—	NM	—	—	—
84	4B, 4C	Py	dsGFP		30	13	—	—	—	1	—	—	—	73	—	—	—
85	4B, 4C	Py	dsGFP		30	13	—	—	—	1	—	—	—	70	—	—	—
86	4B, 4C	Py	dsGFP		45	8	—	—	—	1	—	—	—	82	—	—	—
87	4B, 4C	Py	dsGFP		36	11	—	—	—	1	—	—	—	55	—	—	—
88	4B, 4C	Py	dsTEP3	1	29	44	84	0.01	4.7e-06	2	84	0.36	0.3714	17	84	2.9e-05	6.8e-09
89	4B, 4C	Py	dsTEP3	1	46	52	86	0.00003	—	1	86	0.33	—	15	86	1.0e-05	—
90	4B, 4C	Py	dsTEP4	2	28	14	84	1	1	1	84	1	1	71	84	1	0.30
91	4B, 4C	Py	dsTEP4	2	42	7	86	1	—	1	86	1	—	64	86	0.087	—
92	4B, 4C	Py	dsTEP12	3	30	10	85	1	NA	1	85	1	NA	46	85	0.12	0.25
93	4B, 4C	Py	dsTEP12	3	42	14	86	0.51	—	1.5	86	0.20	—	76	86	0.60	—
94	4B, 4C	Py	dsTEP15	3	66	9	86	1	0.85	1	86	1	1	68	86	0.12	NA
95	4B, 4C	Py	dsTEP15	3	33	18	87	0.50	—	1	87	1	—	66	87	0.46	—
96		Pf	dsGFP		36	25	—	—	—	1	—	—	—	NM	—	—	—
97		Pf	dsGFP		35	36	—	—	—	1	—	—	—	NM	—	—	—
98		Pf	dsLRR7048	3	36	37	96	0.44	0.44	1	96	0.81	0.80	NM	—	—	—
99		Pf	dsLRR7048	3	36	50	97	0.34	—	1	97	0.55	—	NM	—	—	—
100		Py	dsGFP		53	15	—	—	—	1	—	—	—	68	—	—	—
101		Py	dsGFP		30	16	—	—	—	1	—	—	—	70	—	—	—
102		Py	dsLRR7048	3	55	18	100	0.80	NA	1	100	1	1	76	100	0.39	NA
103		Py	dsLRR7048	3	30	13	101	1	—	1	101	1	—	66	101	1	—
104		Pf	dsGFP		42	45	—	—	—	1	—	—	—	NM	—	—	—
105		Pf	dsGFP		40	78	—	—	—	4	—	—	—	NM	—	—	—
106		Pf	dsGFP		20	60	—	—	—	8.5	—	—	—	NM	—	—	—
107		Pf	dsDLL	3	47	68	104	0.034	0.18	2	104	0.048	NA	NM	—	—	—
108		Pf	dsDLL	3	40	78	105	1	—	4	105	0.78	—	NM	—	—	—
109		Pf	dsDLL	3	30	77	106	0.34	—	2	106	0.054	—	NM	—	—	—
110		Py	dsGFP		53	15	—	—	—	1	—	—	—	68	—	—	—
111		Py	dsGFP		30	16	—	—	—	1	—	—	—	70	—	—	—
112		Py	dsDLL	3	53	13	110	1	1	1	110	1	NA	70	110	1	1
113		Py	dsDLL	3	30	13	111	1	—	1	111	0.45	—	63	111	0.78	—
114		Pb	dsGFP		30	20	—	—	—	5	—	—	—	NM	—	—	—
115		Pb	dsGFP		32	68	—	—	—	2.5	—	—	—	NM	—	—	—
116		Pb	dsGFP		28	32	—	—	—	3	—	—	—	NM	—	—	—
117		Pb	dsAPL2	3	30	26	114	0.76	NA	2	114	0.30	NA	NM	—	—	—
118		Pb	dsAPL2	3	32	53	115	0.30	—	4	115	0.59	—	NM	—	—	—
119		Pb	dsAPL2	3	27	25	116	0.77	—	2	116	0.88	—	NM	—	—	—
120		Pf	dsGFP		30	60	—	—	—	3	—	—	—	NM	—	—	—
121		Pf	dsGFP		30	93	—	—	—	28.5	—	—	—	NM	—	—	—
122		Pf	dsGFP		30	73	—	—	—	2.5	—	—	—	NM	—	—	—
123		Pf	dsAPL2	3	30	53	120	0.79	0.077	3.5	120	0.52	0.27	NM	—	—	—
124		Pf	dsAPL2	3	30	63	121	0.010	—	25	121	0.95	—	NM	—	—	—
125		Pf	dsAPL2	3	30	60	122	0.41	—	7.5	122	0.047	—	NM	—	—	—
aStatistical differences in oocyst or melanization prevalence were tested for each replicate (target gene vs dsGFP control) using the χ2 test.
b Statistical differences in oocyst intensity were tested for each experimental replicate using the non-parametric Wilcoxon Mann Whitney test.
c The main-text figure presenting the corresponding data.
d Pf, Plasmodium falciparum; Py, Plasmodium yoelii; Pb, Plasmodium berghei.
e The control experiment number (dsGFP) given in column 1 for comparison with the result of target gene silencing.
f Individual p values were computed using 105 Monte-Carlo simulations.
g This p value was calculated using the method of R.A. Fisher to combine independent tests of significance (Fisher, 1925). Notation NA (Not Applicable) indicates that the direction of phenotypic effect among experimental replicates was not consistent and therefore replicates were not statistically combined.
